# Supplementary material for: Comparison of Spatial Modelling Approaches on PM10 and NO2 Concentration Variations: A Case Study in Surabaya City, Indonesia
Source: Int J Environ Res Public Health. 2020 Nov 29;17(23):8883. doi: 10.3390/ijerph17238883 (PMC7730102; doi:10.3390/ijerph17238883)
Supplement: Supplementary file 1 [file ijerph-17-08883-s001.pdf]

# Comparison of Spatial Modelling Approaches on PM<sub>10</sub> and NO<sub>2</sub> Concentration Variations: A Case Study in Surabaya City, Indonesia

Liadira Kusuma Widya <sup>1,2</sup>, Chin-Yu Hsu <sup>3</sup>, Hsiao-Yun Lee <sup>4</sup>, Lalu Muhamad Jaelani <sup>2</sup>, Shih-Chun Candice Lung <sup>5,6,7</sup>, Huey-Jen Su <sup>8</sup> and Chih-Da Wu <sup>1,9,\*</sup>.

<sup>1</sup> Department of Geomatics, National Cheng Kung University, 70101 Tainan City, Taiwan; liadira13@mhs.geodesy.its.ac.id (L.K.W.); chidawu@mail.ncku.edu.tw (C.D.W.)

<sup>2</sup> Department of Geomatics Engineering, Institut Teknologi Sepuluh Nopember, 60111 Surabaya City, Indonesia; liadira13@mhs.geodesy.its.ac.id (L.K.W.); lmjaelani@geodesy.its.ac.id (L.M.J.)

<sup>3</sup> Department of Safety, Health, and Environmental Engineering, Ming Chih University of Technology, 24301 New Taipei City, Taiwan; gracecyhsu@mail.mcut.edu.tw (C.Y.H.)

<sup>4</sup> Department of Leisure Industry and Health Promotion, National Taipei University of Nursing and Health Sciences, 112 Taipei City, Taiwan; hsiaoyun07@ntunhs.edu.tw (H.Y.L.)

<sup>5</sup> Research Center for Environmental Changes, Academia Sinica, 11529 Taipei City, Taiwan; sclung@rcec.sinica.edu.tw (S.C.C.L.)

<sup>6</sup> Department of Atmospheric Sciences, National Taiwan University, 10617 Taipei City, Taiwan; sclung@rcec.sinica.edu.tw (S.C.C.L.)

<sup>7</sup> Institute of Environmental Health, National Taiwan University, 100 Taipei City, Taiwan; sclung@rcec.sinica.edu.tw (S.C.C.L.)

<sup>8</sup> Department of Environmental and Occupational Health, National Cheng Kung University, 70101 Tainan City, Taiwan; hjsu@mail.ncku.edu.tw (H.J.S.)

<sup>9</sup> National Institute of Environmental Health Sciences, National Health Research Institutes, 35053 Miaoli County, Taiwan; chidawu@mail.ncku.edu.tw (C.D.W.)

\* Correspondence: [chidawu@mail.ncku.edu.tw](mailto:chidawu@mail.ncku.edu.tw)

**Table S1.** List of potential predictor variables collected from each database.

| <b>Data Source</b>                                                              | <b>Potential variables</b>        | <b>Geo-format</b> | <b>Measurement</b>                                  | <b>Expected Association</b> |
|---------------------------------------------------------------------------------|-----------------------------------|-------------------|-----------------------------------------------------|-----------------------------|
| <b>Air Pollutant Database</b>                                                   |                                   |                   |                                                     |                             |
| Environmental<br>Bureau of<br>Surabaya City                                     | PM <sub>10</sub>                  | point             | On-site measurement<br>(µg/m <sup>3</sup> )         | +                           |
|                                                                                 | NO <sub>x</sub>                   | point             | On-site measurement<br>(ppm)                        | +                           |
| <b>Meteorological Database</b>                                                  |                                   |                   |                                                     |                             |
| Meteorological,<br>Climatological,<br>and Geophysical<br>Bureau of<br>Indonesia | Temperature                       | point             | On-site measurement<br>(°C)                         | -/+                         |
|                                                                                 | Relative<br>humidity              | point             | On-site measurement<br>(%)                          | -/+                         |
|                                                                                 | Wind speed                        | point             | On-site measurement<br>(km/h)                       | -/+                         |
|                                                                                 | Wind<br>direction                 | point             | On-site measurement                                 | -/+                         |
|                                                                                 | Rainfall                          | point             | On-site measurement<br>(mm/d)                       | -/+                         |
|                                                                                 | Duration of<br>solar<br>radiation | point             | On-site measurement<br>(joule/cm <sup>2</sup> )     | -/+                         |
| <b>GIS – Land Use Database</b>                                                  |                                   |                   |                                                     |                             |
| City<br>Development                                                             | Water<br>reservoirs               | point             | Number within 250-5000m<br>circular buffers (count) | -/+                         |

| Planning Bureau<br>of Surabaya City<br>(BAPPEKO)                        | Installation<br>facility | point          | Number within 250-5000m<br>circular buffers (count) | -/+                     |
|-------------------------------------------------------------------------|--------------------------|----------------|-----------------------------------------------------|-------------------------|
|                                                                         | Sports<br>facility       | point          | Number within 250-5000m<br>circular buffers (count) | -/+                     |
|                                                                         | Government<br>facility   | point          | Number within 250-5000m<br>circular buffers (count) | -/+                     |
|                                                                         | Education<br>facility    | point          | Number within 250-5000m<br>circular buffers (count) | -/+                     |
| Data Source                                                             | Potential<br>variables   | Geo-<br>format | Measurement                                         | Expected<br>Association |
| GIS – Land Use Database                                                 |                          |                |                                                     |                         |
| City<br>Development<br>Planning Bureau<br>of Surabaya City<br>(BAPPEKO) | Trading<br>facility      | point          | Number within 250-5000m<br>circular buffers (count) | -/+                     |
|                                                                         | Worship<br>facility      | point          | Number within 250-5000m<br>circular buffers (count) | -/+                     |
|                                                                         | Office<br>facility       | point          | Number within 250-5000m<br>circular buffers (count) | -/+                     |
|                                                                         | Social<br>facility       | point          | Number within 250-5000m<br>circular buffers (count) | ++                      |
|                                                                         | Terminal<br>facility     | point          | Number within 250-5000m<br>circular buffers (count) | -/+                     |
|                                                                         | Public<br>facility       | point          | Number within 250-5000m<br>circular buffers (count) | -/+                     |
|                                                                         | Tower                    | point          | Number within 250-5000m<br>circular buffers (count) | -/+                     |

|                                                             | PLN substation           | point      | Number within 250-5000m circular buffers (count)         | -/+                  |
|-------------------------------------------------------------|--------------------------|------------|----------------------------------------------------------|----------------------|
|                                                             | Cleanliness Facility     | point      | Number within 250-5000m circular buffers (count)         | -/+                  |
|                                                             | Health facility          | point      | Number within 250-5000m circular buffers (count)         | -/+                  |
|                                                             | Penitentiary facility    | point      | Number within 250-5000m circular buffers (count)         | -/+                  |
|                                                             | Industry and Warehousing | polygon    | Area within 250-5000m circular buffers (m <sup>2</sup> ) | +                    |
|                                                             | Military Area            | polygon    | Area within 250-5000m circular buffers (m <sup>2</sup> ) | -/+                  |
|                                                             | Mangrove                 | polygon    | Area within 250-5000m circular buffers (m <sup>2</sup> ) | -                    |
|                                                             | Trade and Services       | polygon    | Area within 250-5000m circular buffers (m <sup>2</sup> ) | +                    |
|                                                             |                          |            |                                                          |                      |
| Data Source                                                 | Potential variables      | Geo-format | Measurement                                              | Expected Association |
| GIS – Land Use Database                                     |                          |            |                                                          |                      |
| City Development Planning Bureau of Surabaya City (BAPPEKO) | Residential              | polygon    | Area within 250-5000m circular buffers (m <sup>2</sup> ) | +                    |
|                                                             | Major road               | polygon    | Area within 250-5000m circular buffers (m <sup>2</sup> ) | +                    |
|                                                             | Swamp                    | polygon    | Area within 250-5000m circular buffers (m <sup>2</sup> ) | -                    |

|                           |                  |         |                                                          |     |
|---------------------------|------------------|---------|----------------------------------------------------------|-----|
|                           |                  |         |                                                          |     |
|                           | Green open space | polygon | Area within 250-5000m circular buffers (m <sup>2</sup> ) | -   |
|                           | Paddy field      | polygon | Area within 250-5000m circular buffers (m <sup>2</sup> ) | -/+ |
|                           | Shrubs           | polygon | Area within 250-5000m circular buffers (m <sup>2</sup> ) | -/+ |
|                           | River            | polygon | Area within 250-5000m circular buffers (m <sup>2</sup> ) | -   |
|                           | Fishpond         | polygon | Area within 250-5000m circular buffers (m <sup>2</sup> ) | -   |
|                           | Moor             | polygon | Area within 250-5000m circular buffers (m <sup>2</sup> ) | -/+ |
| <b>Satellite Database</b> |                  |         |                                                          |     |
| MODIS                     |                  |         | Area within 250-5000m                                    |     |
| Greenness Database        | NDVI             | grid    | circular buffers (dimensionless)                         | -   |
